# Supplementary material for: Dicationic ditelluride salts stabilized by N-heterocyclic carbene
Source: Royal Society of Chemistry journal article supplement (doi:10.1039/c9nj02138h), 2019-01-01
Supplement: c9nj02138h1.pdf [file c9nj02138h1.pdf]

Electronic Supplementary Information for the paper

Entitled

**Dicationic Ditelluride Salts Stabilized by *N*-Heterocyclic Carbene**

Norio Nakata\*, Fumihiko Kawauchi, Shintaro Takahashi, and Akihiko Ishii\*

*Department of Chemistry, Graduate School of Science and Engineering, Saitama University,  
Shimo-okubo, Sakura-ku, Saitama, 338-8570, Japan*

**Table of Contents**

**Figure S1.**  $^1\text{H}$  NMR (400 MHz, 25 °C,  $\text{CD}_3\text{CN}$ ) of  $\mathbf{2}^{2+} \cdot 2 (\text{OTf})^-$ .

**Figure S2.**  $^{13}\text{C}\{^1\text{H}\}$  NMR (100.7 MHz, 25 °C,  $\text{CD}_3\text{CN}$ ) of  $\mathbf{2}^{2+} \cdot 2 (\text{OTf})^-$ .

**Figure S3.**  $^{19}\text{F}\{^1\text{H}\}$  NMR (470.5 MHz, 25 °C,  $\text{CD}_3\text{CN}$ ) of  $\mathbf{2}^{2+} \cdot 2 (\text{OTf})^-$ .

**Figure S4.**  $^{125}\text{Te}\{^1\text{H}\}$  NMR (94 MHz, 25 °C,  $\text{CD}_3\text{CN}$ ) of  $\mathbf{2}^{2+} \cdot 2 (\text{OTf})^-$ .

**Figure S5.**  $^{19}\text{F}\{^1\text{H}\}$  NMR (470.5 MHz, 25 °C,  $\text{CD}_3\text{CN}$ ) of  $\mathbf{2}^{2+} \cdot 2 [\text{B}(\text{C}_6\text{F}_5)_4]^-$ .

**Figure S6.**  $^{11}\text{B}\{^1\text{H}\}$  NMR (160.4 MHz, 25 °C,  $\text{CD}_3\text{CN}$ ) of  $\mathbf{2}^{2+} \cdot 2 [\text{B}(\text{C}_6\text{F}_5)_4]^-$ .

**Figure S7.**  $^{125}\text{Te}\{^1\text{H}\}$  NMR (94 MHz, 25 °C,  $\text{CD}_3\text{CN}$ ) of  $\mathbf{2}^{2+} \cdot 2 [\text{B}(\text{C}_6\text{F}_5)_4]^-$ .

**Figure S8.** UV/Vis Spectrum of  $\mathbf{2}^{2+} \cdot 2 (\text{OTf})^-$  in  $\text{CD}_3\text{CN}$ .

**Table S1.** Crystallographic data and details of refinement for  $\mathbf{2}^{2+} \cdot 2 (\text{OTf})^-$  and  $\mathbf{2}^{2+} \cdot 2 [\text{B}(\text{C}_6\text{F}_5)_4]^-$ .

**Computational details**

**Figure S9.** Optimized geometry of  $\mathbf{3}^{2+}$  [B3LYP/6-31G+(d) for C, H, N and LanL2DZ for Te level].

**Figure S10.** Optimized geometry of **4** [B3LYP/6-31G+(d) for C, H and LanL2DZ for Te level].

**Figure S11.** Optimized geometry of **1** [B3LYP/6-31G+(d) for C, H, N and LanL2DZ for Te level].

**Table S2.** NPA charges and WBI of **1**, **3<sup>2+</sup>**, and **4**.

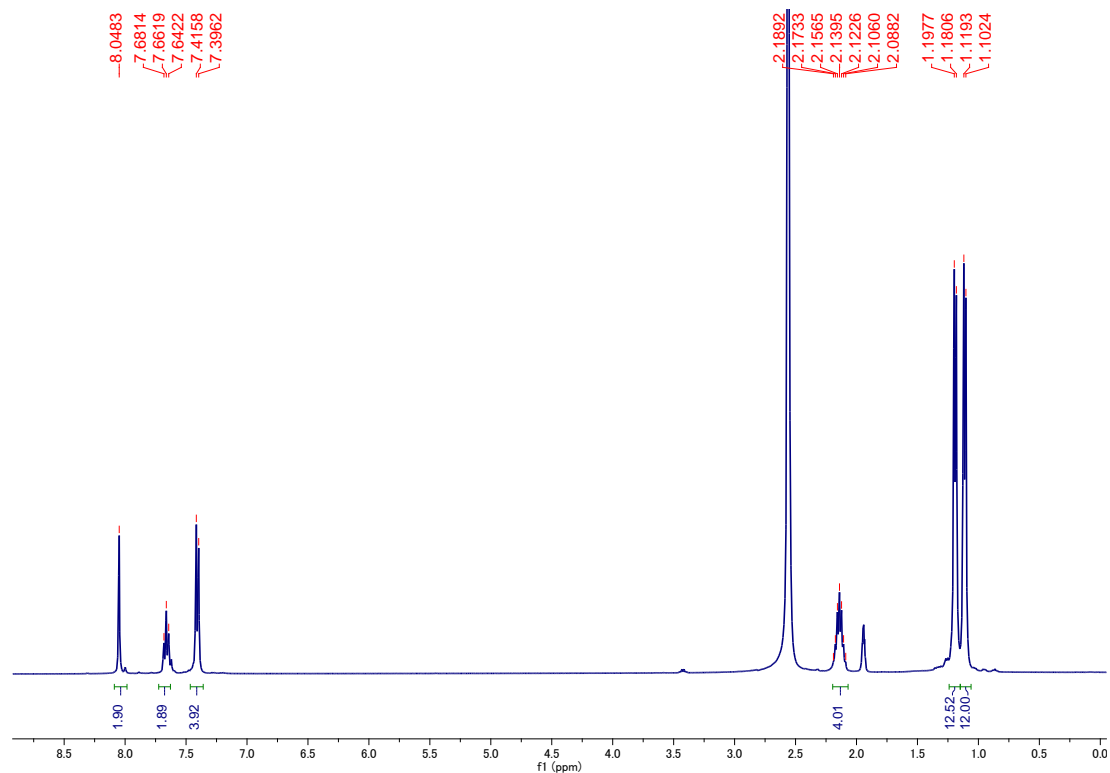

**Figure S1.**  $^1\text{H}$  NMR (400 MHz, 25 °C,  $\text{CD}_3\text{CN}$ ) of  $2^{2+} 2 (\text{OTf})^-$ .

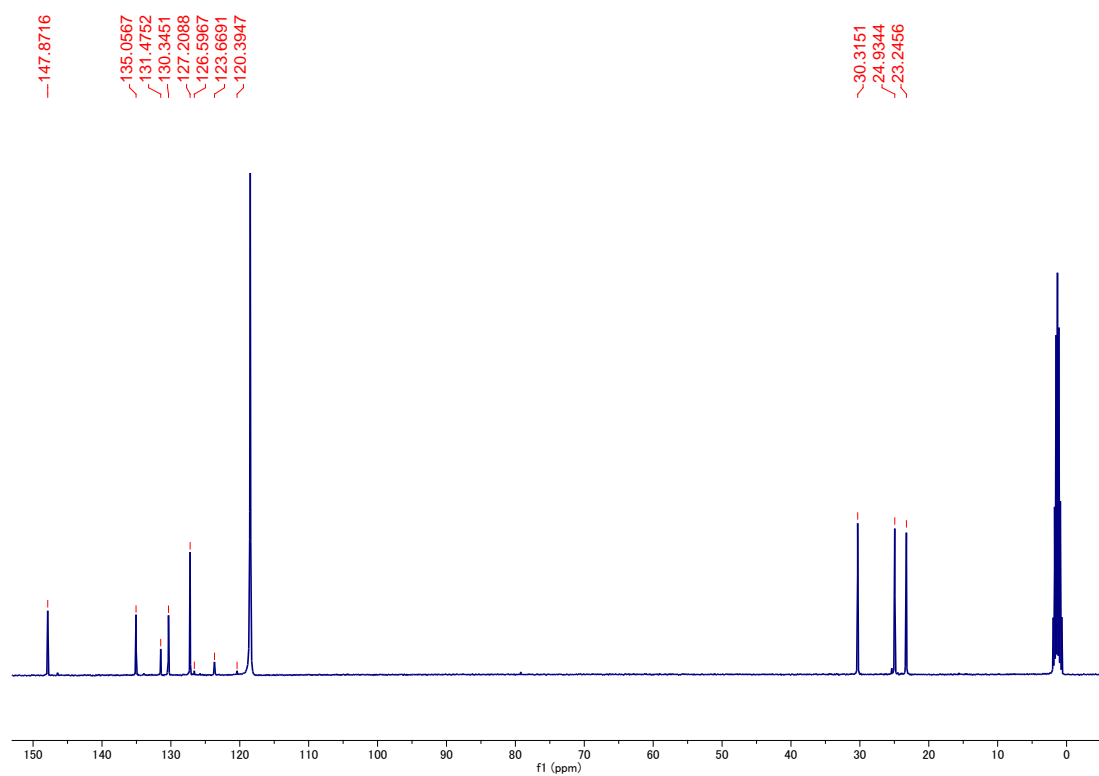

**Figure S2.**  $^{13}\text{C}\{^1\text{H}\}$  NMR (100.7 MHz, 25 °C,  $\text{CD}_3\text{CN}$ ) of  $2^{2+} 2 (\text{OTf})^-$ .

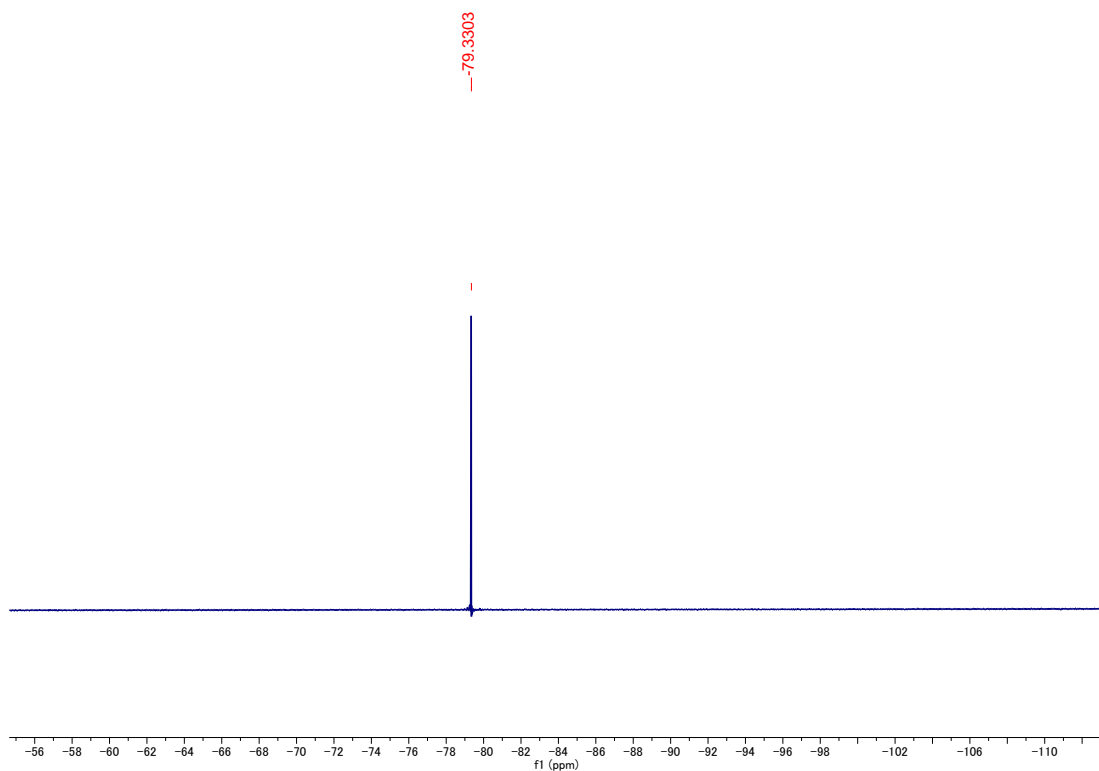

**Figure S3.**  $^{19}\text{F}\{^1\text{H}\}$  NMR (470.5 MHz, 25 °C,  $\text{CD}_3\text{CN}$ ) of  $2^{2+} 2 (\text{OTf})^-$ .

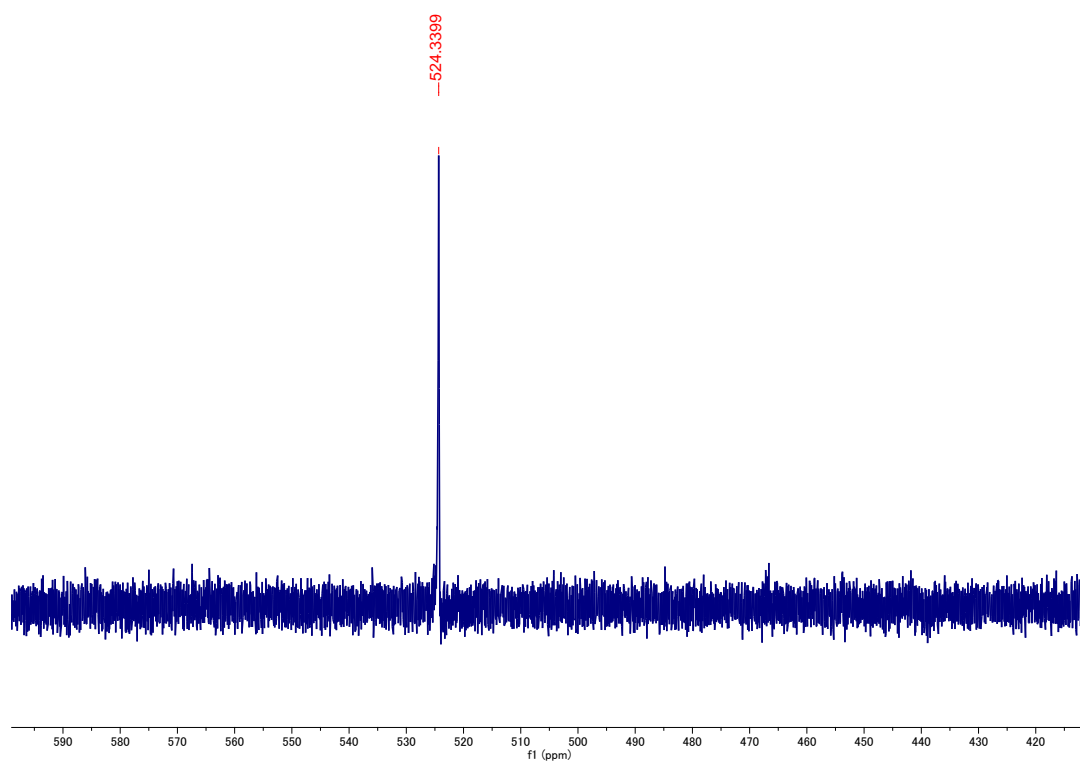

**Figure S4.**  $^{125}\text{Te}\{^1\text{H}\}$  NMR (94 MHz, 25 °C,  $\text{CD}_3\text{CN}$ ) of  $2^{2+} 2 (\text{OTf})^-$ .

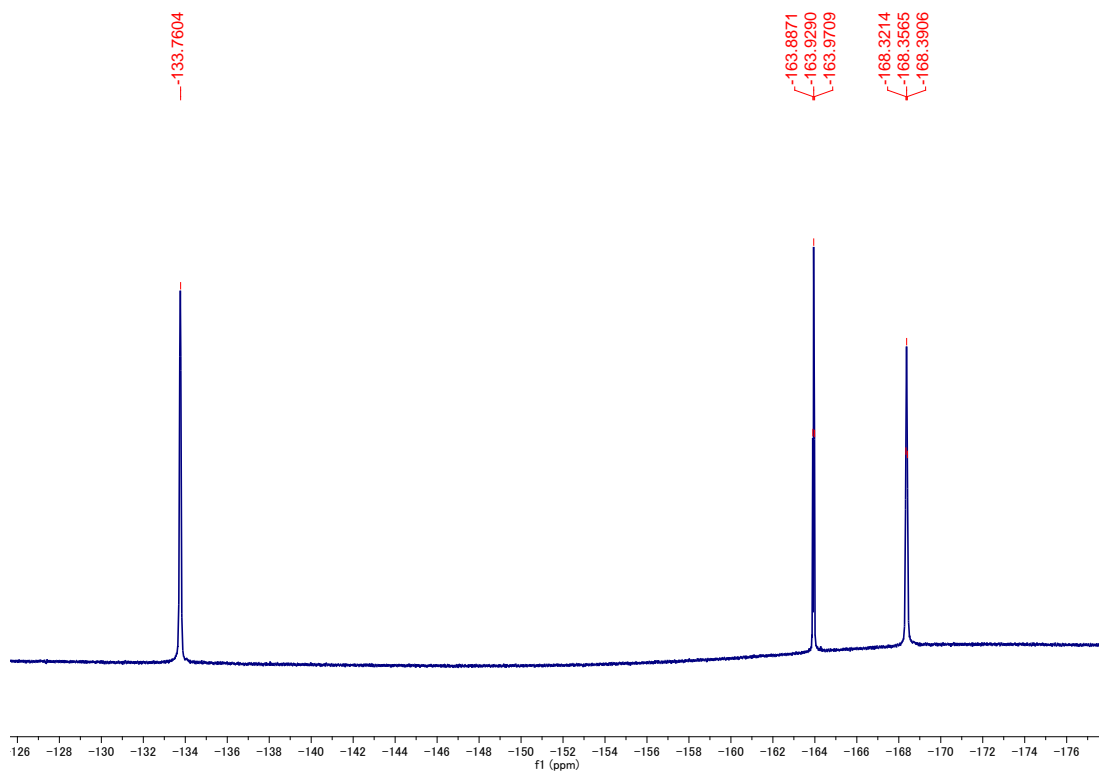

**Figure S5.**  $^{19}\text{F}\{^1\text{H}\}$  NMR (470.5 MHz, 25 °C,  $\text{CD}_3\text{CN}$ ) of  $2^{2+} 2 [\text{B}(\text{C}_6\text{F}_5)_4]^-$

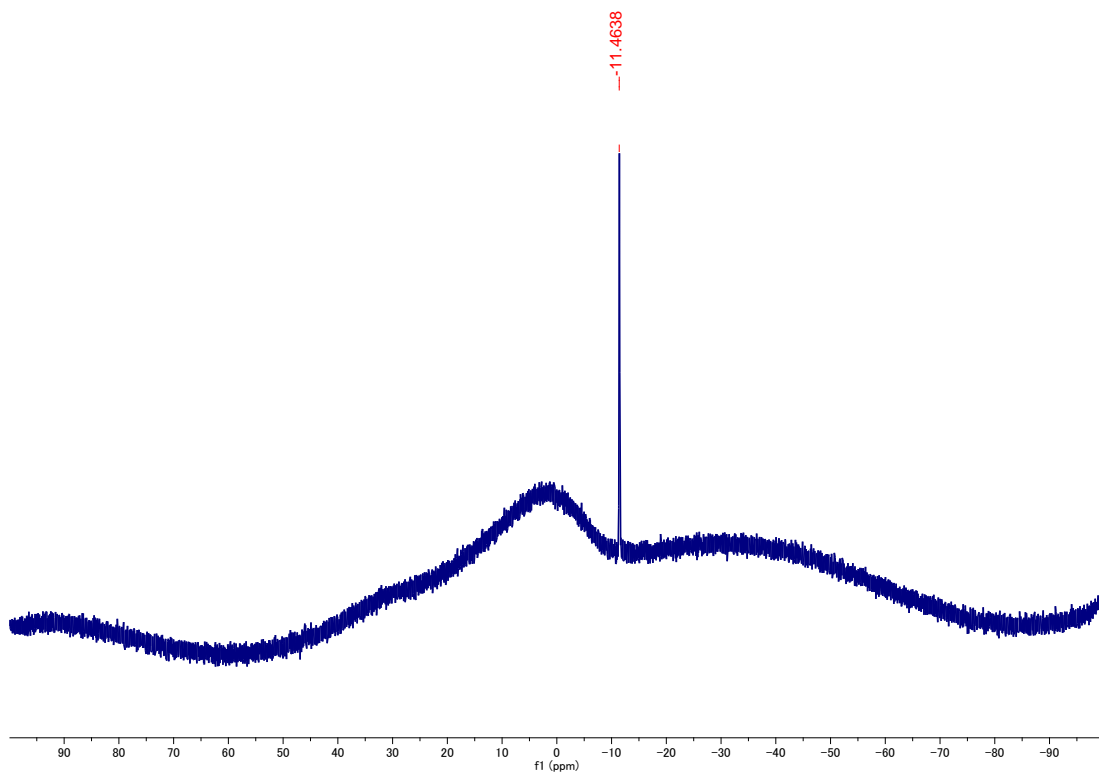

**Figure S6.**  $^{11}\text{B}\{^1\text{H}\}$  NMR (160.4 MHz, 25 °C,  $\text{CD}_3\text{CN}$ ) of  $2^{2+} 2 [\text{B}(\text{C}_6\text{F}_5)_4]^-$ .

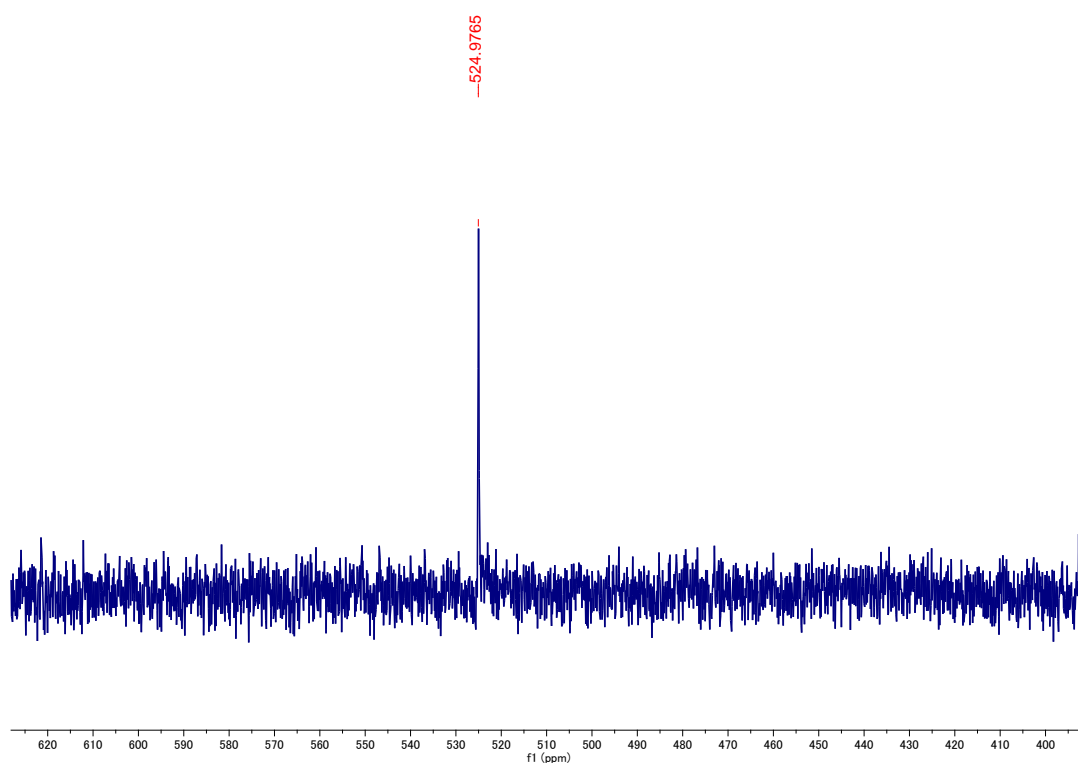

**Figure S7.**  $^{125}\text{Te}\{^1\text{H}\}$  NMR (94 MHz, 25 °C,  $\text{CD}_3\text{CN}$ ) of  $2^{2+} 2 [\text{B}(\text{C}_6\text{F}_5)_4]^-$ .

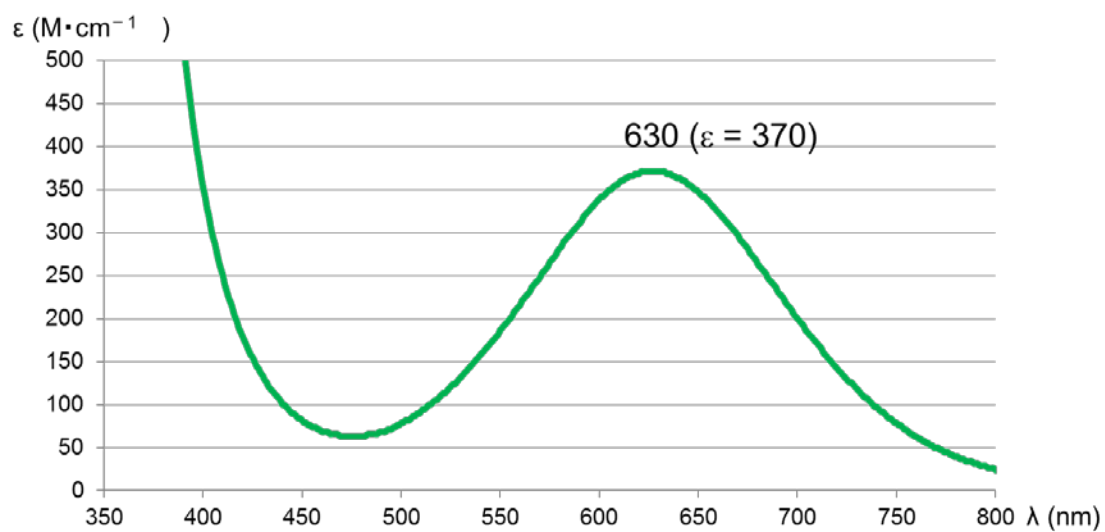

**Figure S8.** UV/Vis spectrum of  $2^{2+} 2 (\text{TfO})^-$  in  $\text{CD}_3\text{CN}$ .

**Table S1.** Crystallographic data and details of refinement for  $2^{2+} 2 (\text{OTf})^-$  and  $2^{2+} 2 [\text{B}(\text{C}_6\text{F}_5)_4]^-$ .

|                                       | $2^{2+} 2 (\text{OTf})^-$                                                       | $2^{2+} 2 [\text{B}(\text{C}_6\text{F}_5)_4]^-$                           |
|---------------------------------------|---------------------------------------------------------------------------------|---------------------------------------------------------------------------|
| Formula                               | $\text{C}_{56}\text{H}_{72}\text{F}_6\text{N}_4\text{O}_6\text{S}_2\text{Te}_2$ | $\text{C}_{106}\text{H}_{78}\text{B}_2\text{F}_{40}\text{N}_6\text{Te}_2$ |
| Formula weight                        | 1330.50                                                                         | 2472.56                                                                   |
| Color                                 | green                                                                           | blue                                                                      |
| Crystal size / mm                     | $0.30 \times 0.28 \times 0.17$                                                  | $0.20 \times 0.09 \times 0.07$                                            |
| Temperature / K                       | 90                                                                              | 90                                                                        |
| Crystal system                        | triclinic                                                                       | monoclinic                                                                |
| Space group                           | $P-1$                                                                           | $P2_1/n$                                                                  |
| $a / \text{\AA}$                      | 11.9321(11)                                                                     | 11.0816(8)                                                                |
| $b / \text{\AA}$                      | 12.2008(12)                                                                     | 18.5142(13)                                                               |
| $c / \text{\AA}$                      | 12.6710(10)                                                                     | 25.3460(18)                                                               |
| $a / \text{deg.}$                     | 89.3920(10)                                                                     | 90                                                                        |
| $b / \text{deg.}$                     | 64.7660(10)                                                                     | 101.5380(10)                                                              |
| $g / \text{deg.}$                     | 64.8090(10)                                                                     | 90                                                                        |
| $V / \text{\AA}^3$                    | 1469.7(2)                                                                       | 5095.1(6)                                                                 |
| $Z$                                   | 1                                                                               | 2                                                                         |
| $D_{\text{calcd}} / \text{g cm}^{-3}$ | 1.496                                                                           | 1.612                                                                     |
| No. of unique data                    | 5367                                                                            | 11440                                                                     |
| No. of parameters                     | 398                                                                             | 712                                                                       |
| No. of restraints                     | 0                                                                               | 0                                                                         |
| $R_1 (I > 2s(I))$                     | 0.0468                                                                          | 0.0278                                                                    |
| $wR_2$ (all data)                     | 0.1230                                                                          | 0.0748                                                                    |
| GOF                                   | 1.010                                                                           | 1.029                                                                     |

## Computational details

Atomic Coordinates for  $3^{2+}$  in  $C_i$  symmetry.

Total Energy: -1706.23776716 hartree

|    |           |           |           |
|----|-----------|-----------|-----------|
| Te | 0.050951  | 1.407219  | 0.404624  |
| N  | 0.083300  | 1.716410  | -2.810013 |
| N  | 0.092636  | 3.563098  | -1.666140 |
| C  | 0.078230  | 0.335078  | -3.228578 |
| C  | 1.317649  | 5.823059  | 1.006946  |
| H  | 2.257542  | 6.184218  | 1.416214  |
| C  | 1.342417  | 4.900462  | -0.042355 |
| C  | -2.464593 | 0.456601  | -3.287730 |
| H  | -2.547329 | 1.355977  | -3.909505 |
| C  | 0.097593  | 4.472901  | -0.543045 |
| C  | 2.622971  | 0.397979  | -3.164433 |
| H  | 2.720288  | 0.635575  | -2.097614 |
| C  | 1.286322  | -1.579477 | -4.001382 |
| H  | 2.223456  | -2.091508 | -4.203352 |
| C  | 0.102256  | 2.769029  | -3.717553 |
| H  | 0.110781  | 2.587661  | -4.782344 |
| C  | 0.108562  | 3.920929  | -3.002143 |
| H  | 0.123439  | 4.955803  | -3.311619 |
| H  | 2.727158  | 1.337310  | -3.719799 |
| C  | -2.447403 | 4.519132  | -0.680091 |
| H  | -2.554921 | 3.428693  | -0.710279 |
| C  | -1.103375 | 5.865935  | 0.983486  |
| H  | -2.037770 | 6.259989  | 1.374654  |
| C  | -1.163243 | -0.262718 | -3.518929 |
| H  | -3.310362 | -0.190155 | -3.533736 |
| C  | -1.140295 | 4.945884  | -0.067757 |
| C  | 1.318428  | -0.289146 | -3.463796 |
| H  | 3.489228  | 4.873578  | -0.098348 |
| C  | 0.110126  | 6.300714  | 1.512811  |



|    |           |           |           |
|----|-----------|-----------|-----------|
| H  | 0.115254  | 7.030790  | 2.317877  |
| C  | -1.134850 | -1.554999 | -4.052764 |
| H  | -2.072713 | -2.047759 | -4.295236 |
| H  | -2.549453 | 4.887511  | -1.708345 |
| C  | 2.645237  | 4.416507  | -0.620842 |
| H  | 2.739264  | 4.673502  | -1.682656 |
| C  | 0.075034  | -2.203227 | -4.295815 |
| H  | 0.074108  | -3.200214 | -4.728098 |
| H  | 2.753621  | 3.328404  | -0.535518 |
| C  | 0.077060  | 2.218628  | -1.558856 |
| H  | 3.465918  | -0.241059 | -3.438638 |
| H  | -2.578773 | 0.770464  | -2.242951 |
| H  | -3.287630 | 4.919209  | -0.107115 |
| Te | -0.050951 | -1.407219 | -0.404624 |
| N  | -0.083300 | -1.716410 | 2.810013  |
| N  | -0.092636 | -3.563098 | 1.666140  |
| C  | -0.078230 | -0.335078 | 3.228578  |
| C  | -1.317649 | -5.823059 | -1.006946 |
| H  | -2.257542 | -6.184218 | -1.416214 |
| C  | -1.342417 | -4.900462 | 0.042355  |
| C  | 2.464593  | -0.456601 | 3.287730  |
| H  | 2.547329  | -1.355977 | 3.909505  |
| C  | -0.097593 | -4.472901 | 0.543045  |
| C  | -2.622971 | -0.397979 | 3.164433  |
| H  | -2.720288 | -0.635575 | 2.097614  |
| C  | -1.286322 | 1.579477  | 4.001382  |
| H  | -2.223456 | 2.091508  | 4.203352  |
| C  | -0.102256 | -2.769029 | 3.717553  |
| H  | -0.110781 | -2.587661 | 4.782344  |
| C  | -0.108562 | -3.920929 | 3.002143  |
| H  | -0.123439 | -4.955803 | 3.311619  |
| H  | -2.727158 | -1.337310 | 3.719799  |
| C  | 2.447403  | -4.519132 | 0.680091  |

|   |           |           |           |
|---|-----------|-----------|-----------|
| H | 2.554921  | -3.428693 | 0.710279  |
| C | 1.103375  | -5.865935 | -0.983486 |
| H | 2.037770  | -6.259989 | -1.374654 |
| C | 1.163243  | 0.262718  | 3.518929  |
| H | 3.310362  | 0.190155  | 3.533736  |
| C | 1.140295  | -4.945884 | 0.067757  |
| C | -1.318428 | 0.289146  | 3.463796  |
| H | -3.489228 | -4.873578 | 0.098348  |
| C | -0.110126 | -6.300714 | -1.512811 |
| H | -0.115254 | -7.030790 | -2.317877 |
| C | 1.134850  | 1.554999  | 4.052764  |
| H | 2.072713  | 2.047759  | 4.295236  |
| H | 2.549453  | -4.887511 | 1.708345  |
| C | -2.645237 | -4.416507 | 0.620842  |
| H | -2.739264 | -4.673502 | 1.682656  |
| C | -0.075034 | 2.203227  | 4.295815  |
| H | -0.074108 | 3.200214  | 4.728098  |
| H | -2.753621 | -3.328404 | 0.535518  |
| C | -0.077060 | -2.218628 | 1.558856  |
| H | -3.465918 | 0.241059  | 3.438638  |
| H | 2.578773  | -0.770464 | 2.242951  |
| H | 3.287630  | -4.919209 | 0.107115  |

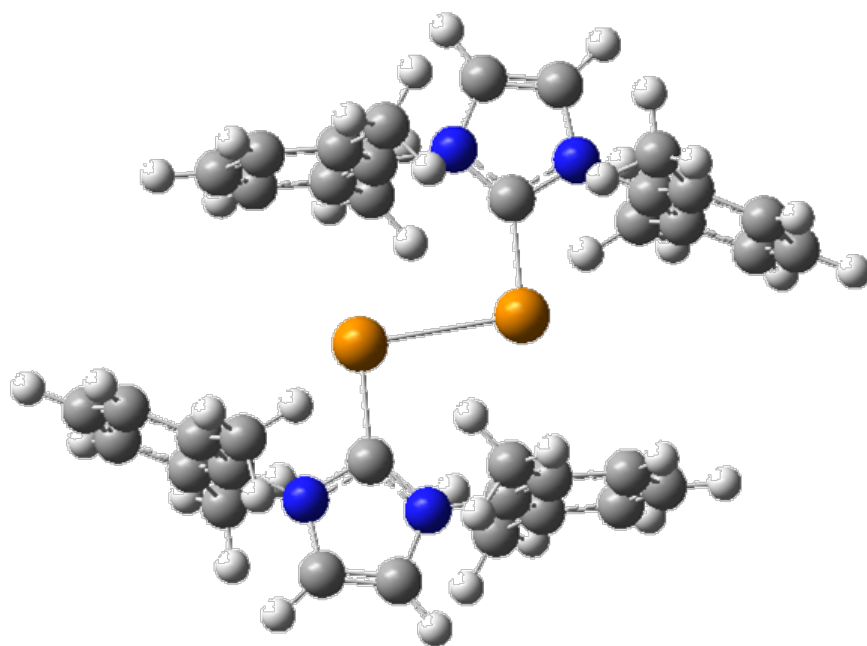

**Figure S8.** Optimized geometry of  $3^{2+}$  [B3LYP/6-31G+(d) for C, H, N and LanL2DZ for Te level].

Atomic Coordinates for **4**.

Total Energy: -95.95396251 hartree

|    |             |             |             |
|----|-------------|-------------|-------------|
| Te | -1.37099594 | -0.24038776 | -0.29659056 |
| Te | 1.37098525  | -0.24036257 | 0.29661296  |
| C  | 1.98065381  | 1.30609668  | -1.10359577 |
| H  | 1.71249427  | 1.01200638  | -2.11930448 |
| H  | 1.51348553  | 2.25652789  | -0.84211988 |
| H  | 3.06804146  | 1.39374208  | -1.01946693 |
| C  | -1.98060345 | 1.30622098  | 1.10348289  |
| H  | -1.71251784 | 1.01222119  | 2.11923255  |
| H  | -1.51328183 | 2.25655218  | 0.84189316  |
| H  | -3.06796779 | 1.39406170  | 1.01927762  |

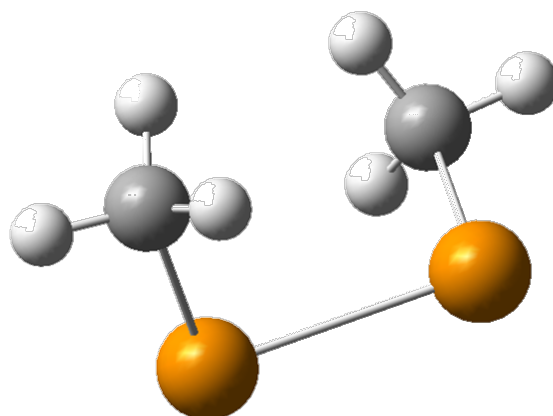

**Figure S9.** Optimized geometry of **4** [B3LYP/6-31G+(d) for C, H and LanL2DZ for Te level].

Atomic Coordinates for **1**.

Total Energy: -853.35994074 hartree

|    |             |             |             |
|----|-------------|-------------|-------------|
| Te | -0.14762400 | -0.19810500 | 1.87156700  |
| N  | 1.13548900  | 0.11241300  | -0.97541100 |
| N  | -1.03418600 | 0.12378300  | -1.08109500 |
| C  | 2.51036100  | 0.05906700  | -0.53931500 |
| C  | -4.41636000 | -1.19195000 | -0.31741000 |
| H  | -4.94935000 | -2.13903800 | -0.30062900 |
| C  | -3.06131800 | -1.17989500 | -0.65880000 |
| C  | 2.45296200  | 2.59751300  | -0.34641800 |
| H  | 2.06565200  | 2.80551200  | -1.35093500 |
| C  | -2.42068200 | 0.07405200  | -0.67579900 |
| C  | 2.41307700  | -2.46848900 | -0.83218800 |
| H  | 1.61164300  | -2.65278600 | -0.10571400 |
| C  | 4.52096800  | -1.20201000 | -0.24034800 |
| H  | 5.05382000  | -2.14920300 | -0.23132000 |
| C  | 0.78382900  | 0.25859500  | -2.31218400 |
| H  | 1.53743900  | 0.34168900  | -3.08154300 |
| C  | -0.57062000 | 0.26502100  | -2.37661000 |
| H  | -1.24708200 | 0.35521000  | -3.21400200 |
| H  | 1.95451300  | -2.44966800 | -1.82767500 |
| C  | -2.37187500 | 2.61688500  | -0.50392600 |
| H  | -1.45655900 | 2.64801800  | 0.09836800  |
| C  | -4.42969800 | 1.21643300  | -0.06589300 |
| H  | -4.97280400 | 2.13381900  | 0.14582400  |
| C  | 3.17177000  | 1.27675700  | -0.28894200 |
| H  | 3.12810000  | 3.41456400  | -0.08042100 |
| C  | -3.07543000 | 1.29009100  | -0.40279200 |
| C  | 3.15337400  | -1.19374800 | -0.53121200 |
| H  | -3.01507400 | -3.30714800 | -0.95087500 |
| C  | -5.09241700 | -0.00871800 | -0.02573500 |
| H  | -6.15044300 | -0.04031800 | 0.22074400  |
| C  | 4.53862500  | 1.20793800  | -0.00128200 |

|   |             |             |             |
|---|-------------|-------------|-------------|
| H | 5.08529600  | 2.12714200  | 0.19212600  |
| H | -2.09123200 | 2.84574200  | -1.53943900 |
| C | -2.33919900 | -2.45103200 | -1.01789800 |
| H | -1.94850400 | -2.42151800 | -2.04201900 |
| C | 5.20595400  | -0.01574800 | 0.01762300  |
| H | 6.27215200  | -0.04417400 | 0.22562900  |
| H | -1.49213600 | -2.64537500 | -0.34878600 |
| C | 0.01193200  | 0.03185200  | -0.23461000 |
| H | 3.09183200  | -3.32424800 | -0.79923900 |
| H | 1.60199900  | 2.63079800  | 0.34485900  |
| H | -3.02345900 | 3.42337500  | -0.15844600 |

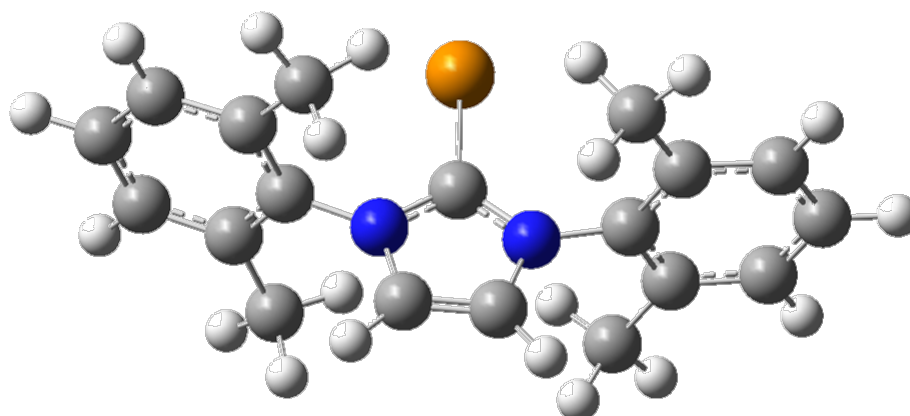

**Figure S10.** Optimized geometry of **1** [B3LYP/6-31G+(d) for C, H, N and LanL2DZ for Te level].

**Table S2.** NPA charges and WBI of **1**, **3<sup>2+</sup>**, and **4**.

| Compounds             | NPA                                                                                                            | WBI                         |
|-----------------------|----------------------------------------------------------------------------------------------------------------|-----------------------------|
| <b>1</b>              | C <sub>carbene</sub> : +0.190<br>N: -0.453, -0.453<br>Te: -0.212<br>C <sub>NHC-backbone</sub> : -0.086, -0.082 | C-Te: 1.155                 |
| <b>3<sup>2+</sup></b> | C <sub>carbene</sub> : +0.157<br>N: -0.366, -0.366<br>Te: +0.463<br>C <sub>NHC-backbone</sub> : -0.046, -0.055 | C-Te: 0.945<br>Te-Te: 0.885 |
| <b>4</b>              | Te: +0.227<br>C: -0.1.013                                                                                      | C-Te: 1.041<br>Te-Te: 0.949 |
